# Supplementary material for: A Novel lncRNA, LINC00460, Affects Cell Proliferation and Apoptosis by Regulating KLF2 and CUL4A Expression in Colorectal Cancer
Source: PubMed Central journal article supplement — Mol Ther Nucleic Acids. 2018 Jul 6;12:684–97. doi: 10.1016/j.omtn.2018.06.012 (PMC6083012; doi:10.1016/j.omtn.2018.06.012), 2018-07-06
Supplement: mmc1.pdf [file mmc1.pdf]

OMTN, Volume 12

## **Supplemental Information**

### **A Novel lncRNA, LINC00460, Affects Cell Proliferation and Apoptosis by Regulating KLF2 and CUL4A Expression in Colorectal Cancer**

**Yifan Lian, Changsheng Yan, Hongzhi Xu, Jiebin Yang, Yang Yu, Jing Zhou, Yongguo Shi, Jianlin Ren, Guozhong Ji, and Keming Wang**

**Supplementary Table 1.** Correlation between clinicopathological parameters and LINC00460 expression levels in 60 CRC Patients

| <b>Characteristics</b>       | <b>LINC00460</b>        |                          | <b>P Value</b>   |
|------------------------------|-------------------------|--------------------------|------------------|
|                              | Low No. Cases<br>(n=30) | High No. Cases<br>(n=30) | Chi-squared test |
| <b>Age(years)</b>            |                         |                          | 0.288            |
| ≤60                          | 14                      | 9                        |                  |
| >60                          | 16                      | 21                       |                  |
| <b>Gender</b>                |                         |                          | 0.589            |
| Male                         | 18                      | 21                       |                  |
| Female                       | 12                      | 9                        |                  |
| <b>Tumor size(cm)</b>        |                         |                          | 0.029*           |
| ≤5                           | 15                      | 6                        |                  |
| >5                           | 15                      | 24                       |                  |
| <b>Histological grade</b>    |                         |                          | 0.299            |
| Well/Moderate                | 16                      | 11                       |                  |
| Poor                         | 14                      | 19                       |                  |
| <b>TNM Stage</b>             |                         |                          | 0.020*           |
| I/II                         | 13                      | 4                        |                  |
| III/IV                       | 17                      | 26                       |                  |
| <b>Lymph node metastasis</b> |                         |                          | 0.047*           |
| Positive                     | 17                      | 25                       |                  |
| Negative                     | 13                      | 5                        |                  |

**Supplementary Table 2.** Univariate and Multivariate Analyses of Various Potential Prognostic Factors in 60 CRC Patients

| Variables                           | Univariate analysis |       |             | Multivariate analysis |       |             |
|-------------------------------------|---------------------|-------|-------------|-----------------------|-------|-------------|
|                                     | P value             | HR    | 95% CI      | P value               | HR    | 95% CI      |
| Age( $\leq$ 60 years vs. >60 years) | 0.438               | 0.994 | 0.980,1.009 | 0.354                 | 0.827 | 0.553,1.236 |
| Gender(male vs. femal)              | 0.663               | 0.917 | 0.623,1.351 | 0.474                 | 0.994 | 0.978,1.010 |
| TNM Stage (I+II vs. III+IV)         | <0.000              | 2.441 | 1.860,3.204 | <0.000                | 2.124 | 1.603,2.815 |
| Tumor size( $\leq$ 5cm vs. >5cm)    | <0.000              | 2.112 | 1.502,2.970 | 0.014                 | 1.593 | 1.100,2.308 |
| Lymphatic metastasis (NO vs. YES)   | <0.000              | 1.577 | 1.273,1.952 | 0.86                  | 1.037 | 0.694,1.549 |
| Grade(Well&Moderate vs. Poor)       | 0.507               | 1.144 | 0.769,1.703 | 0.248                 | 1.292 | 0.836,1.995 |
| LINC00460 expression( High vs. Low) | 0.013               | 2.676 | 1.230,5.823 | 0.016                 | 2.525 | 1.185,5.379 |

HR, hazard ratio; 95 % CI, 95 % confidence interval, \* Overall P < 0.05.

**Supplementary Table 3.** Primers, siRNAs and shRNAs sequence

**Primers used for qPCR Sequences (5' to 3')**

|                     |                         |
|---------------------|-------------------------|
| LINC00460 (Forward) | AGAAATCCTCCAGCCCTGTT    |
| LINC00460 (Reverse) | GGGTGACTCTTAGCCGAGAA    |
| GAPDH (Forward)     | GAAGAGAGAGACCCTCACGCTG  |
| GAPDH (Reverse)     | ACTGTGAGGAGGGGAGATTCACT |
| CUL4A (Forward)     | ACAACCTACACGCAGGACACG   |
| CUL4A (Reverse)     | CCTGGACGTGGTCTTCACA     |
| LSD1 (Forward)      | AGCGTCATGGTCTTATCAA     |
| LSD1 (Reverse)      | GAAATGTGGCAACTCGTC      |
| EZH2 (Forward)      | TGCACATCCTGACTTCTGTG    |
| EZH2 (Reverse)      | AAGGGCATTACCAACTCC      |
| P21 (Forward)       | AAGTCAGTTCCTTGTGGAGCC   |

|                |                            |
|----------------|----------------------------|
| P21 (Reverse)  | GGTTCTGACGGACATCCCCA       |
| KLF2 (Forward) | CTGCACATGAAACGGCACAT       |
| KLF2 (Reverse) | CAGTCACAGTTTGGGAGGGG       |
| U1 (Forward)   | GGGAGATACCATGATCACGAAGGT   |
| U1 (Reverse)   | CCACAAATTATGCAGTCGAGTTTCCC |

**Primer used for qCHIP analysis Sequences (5' to 3')**

|               |                      |
|---------------|----------------------|
| KLF2(Forward) | ACGGGCTTATTGAGGTTGG  |
| KLF2(Reverse) | GCCTGGGTGACAGAGGAGAC |
| P21 (Forward) | GCCTTCCTCACATCCTCC   |
| P21 (Reverse) | CAAGAGTGCCCAGTCCAG   |

**Interference sequences (siRNA)**

|                 |                           |
|-----------------|---------------------------|
| si-LINC00460 1# | UUUGCUGUGAAUUUGAAGUAUGCUG |
| si-LINC00460 2# | CGUGGGAAAGAAGACGCAUUCUGAA |
| si-LINC00460 3# | CCACGCCUCUGAAAUGGUGACAAUA |
| si-NC           | UUCUCCGAACGUGUCACGUTT     |
| sh-LINC00460 1# | GAAAGACTGAGCGTGGGAAAG     |
| sh-LINC004602#  | GACTGAGCGTGGGAAAGAAGA     |

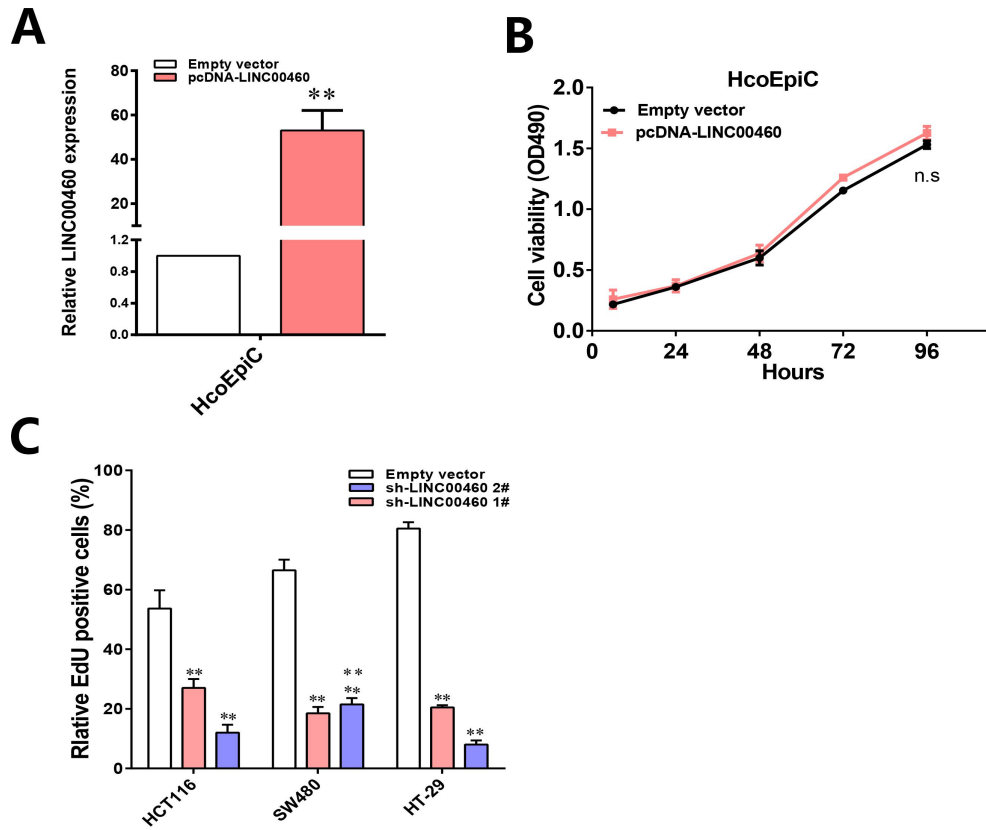

**Figure S1.** (A) qRT-PCR analysis of LINC00460 expression in HcoEpiC cells after transfection with Empty vector or pcDNA-LINC00460. (B) MTT assays were performed to determine the cell viability for pcDNA-LINC00460-transfected HcoEpiC. (C) Cell proliferation of HCT116, SW480 and HT-29 was evaluated 48h after transfection with sh-LINC00460 or Empty vector using EdU-incorporation assays. Red: EdU staining of proliferating cells; blue: DAPI staining of the cell nuclei. Quantitative result of TUNEL assay was analyzed. Representative images and data based on three independent experiments. Bars: s.d,  $*P<0.05$ ,  $**P<0.01$ . n.s., not significant.

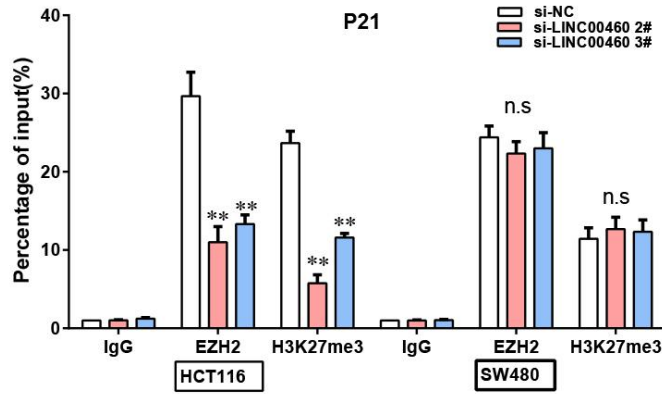

**Figure S2.** ChIP-qPCR of H3K27me3 and EZH2 of the promoter region of the p21 locus after siRNA treatment targeting si-NC or si-LINC00460 in HCT116 and SW480 cells. Antibody enrichment was quantified relative to the amount of input DNA. Antibody directed against IgG was used as a negative control. \* $P < 0.05$ , \*\* $P < 0.01$ . n.s., not significant.

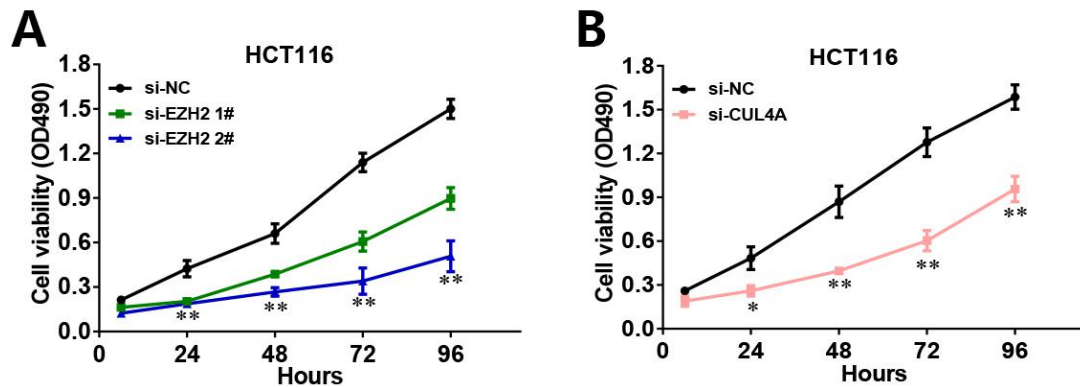

**Figure S3.** (A) MTT assays were used to determine the cell viability when HCT116 cells were transfected with si-NC, si-EZH2. (B) MTT assays were used to determine the cell viability when HCT116 cells were transfected with si-NC, si-CUL4A.

**5.9% (59 of 1,000) of LINC00460-associated protein coding genes (PCGs)**

ADAM19,ALG5,ANKRD10,ASCL5,ATP11A,BIVM,BMP4,CDADC1,CDC16,CUL4A,DCUN1D2,DIS3,ECM1,EFNB2,FAM229B,FAXDC2,FKBP7,GNG4,GPALPP1,GPX8,IGFBP7,ING1,INHBB,KDEL1C1,KIF26B,MAP4K4,MRPS31,MSRB2,NDP,NKD1,NUFIP1,PDLIM7,PFDN2,RAP2A,SEMA3A,SERP2,SFXN3,SH3TC2,SHISA2,SLC6A6,SMOX,SNRPD2,SPIN3,SUGCT,SUGT1,SULT2B1,SUPT20H,TCEAL1,TGFBI,TIMP1,TMEM17,TMEM71,TPM4,TSEN15,TUBA1A,UBAC2,UTP14A,VPS36,WDFY2.

**Figure S4.** 5.9% (59 of 1,000) of LINC00460-associated PCGs were shared by all three microarray profiles (TCGA-CRC, GSE33113, and GSE41328).
